# Supplementary material for: Hematopoietic Stem Cell-derived Adipocytes Promote Tumor Growth and Cancer Cell Migration
Source: PubMed Central journal article supplement (PMC5627654; doi:10.16966/2381-3318.130), 2017-03-08
Supplement: NIHMS859913-supplement-supplement_1.pdf [file NIHMS859913-supplement-supplement_1.pdf]

Supplementary Information

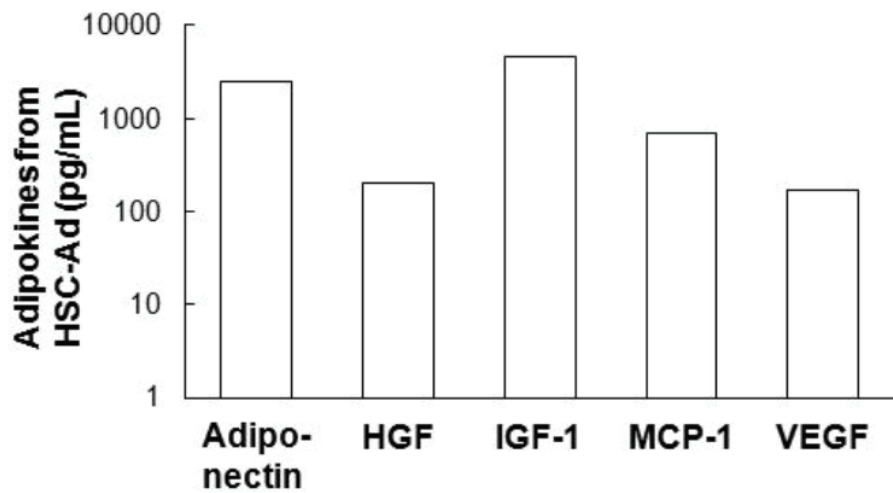

**Supplementary Figure S1:** HSC-Ad secretes adipokines-Ad-CM was subject to individual ELISAs (R&D Systems). The indicated adipokines were confirmed and quantified.

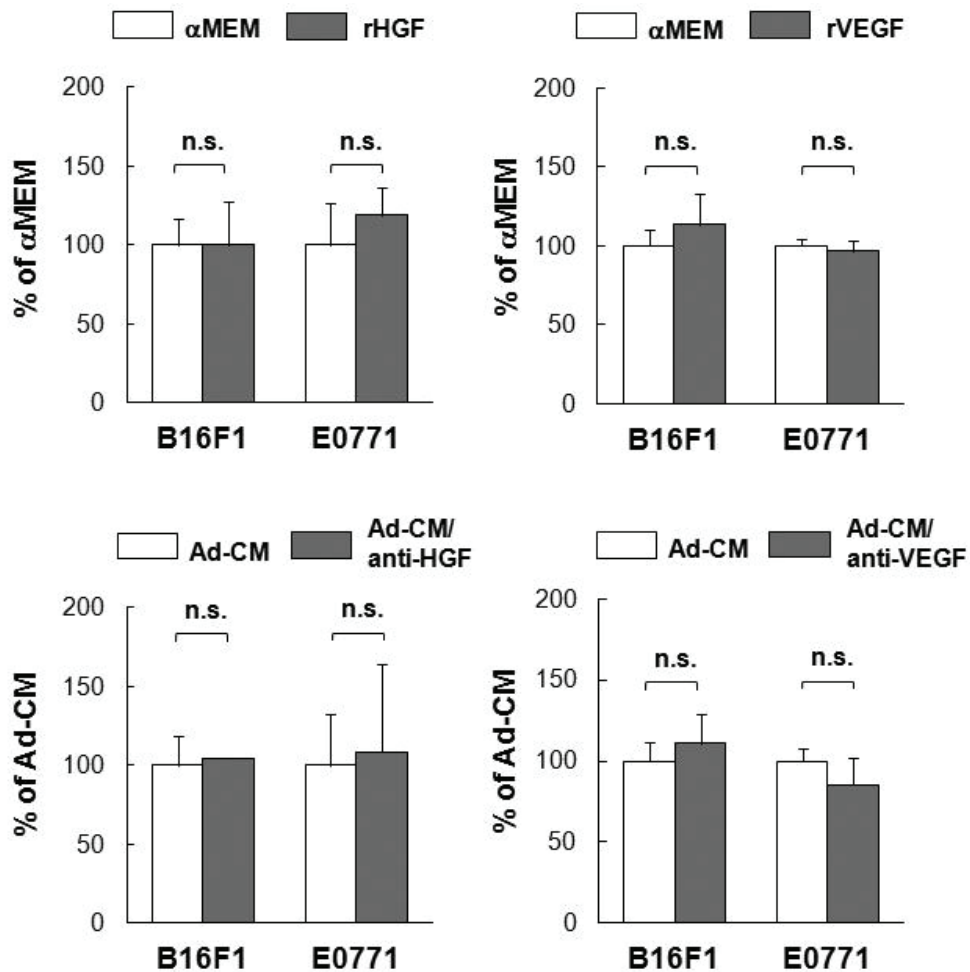

**Supplementary Figure S2:** HGF and VEGF are dispensable for Ad-CM-supported tumor cell proliferation-Tumor cells were cultured for 3 days in (A) αMEM or 100 ng/mL of HGF or VEGF, and (B) Ad-CM or Ad-CM supplemented with 1 μg/mL of anti-HGF or anti-VEGF neutralizing antibodies. Cell numbers were quantified and presented as percentage of αMEM (A) and Ad-CM (B). No significant differences were observed.

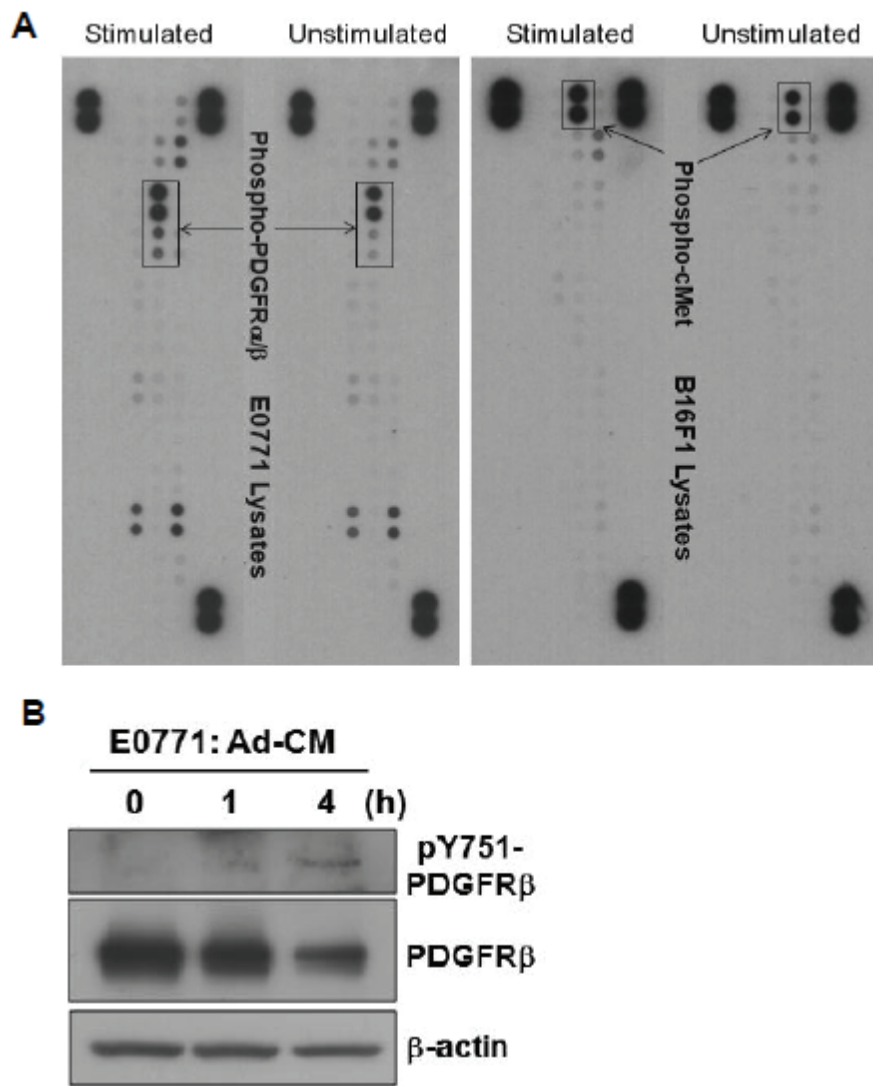

**Supplementary Figure S3:** Ad-CM activates PDGFR signaling-(A)Tumor cells were untreated or treated with Ad-CM at 37°C for 5 min and cell lysates were applied to a Phospho-RTK Array (R&D Systems). Data indicated that Ad-CM stimulation can increase phospho-PDGFR $\alpha/\beta$  level in E0771 cells (left panel) and increase phospho-cMet level in B16F1 cells (right panel). (B) E0771 cells were untreated or treated with Ad-CM at 37°C for the indicated times. Cell lysates were subject to SDS-PAGE and blotted with the indicated antibodies. Data confirmed Ad-CM-stimulated tyrosine phosphorylation and activation of PDGFR $\beta$  in E0771.
